# Supplementary material
Source: PubMed Central journal article supplement (PMC363138)

asparagus lectin

peanut lectin

NK

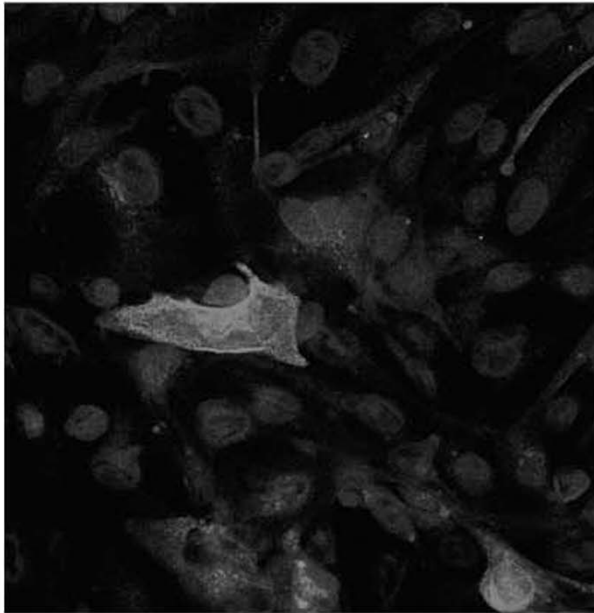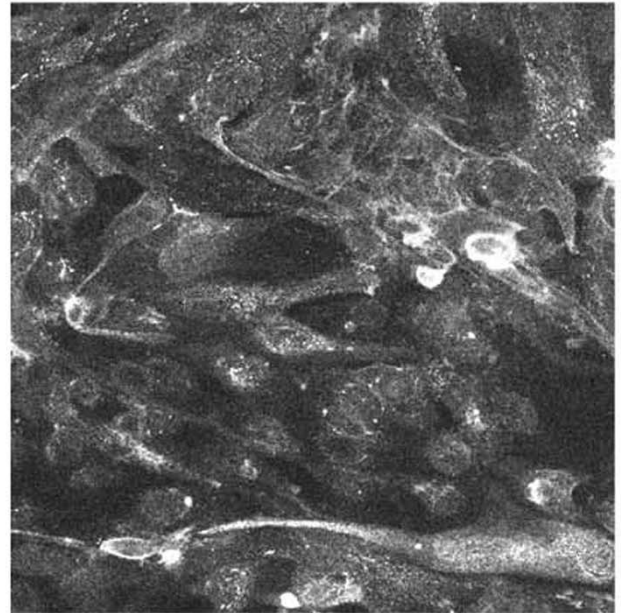

ADPKD

patient 1

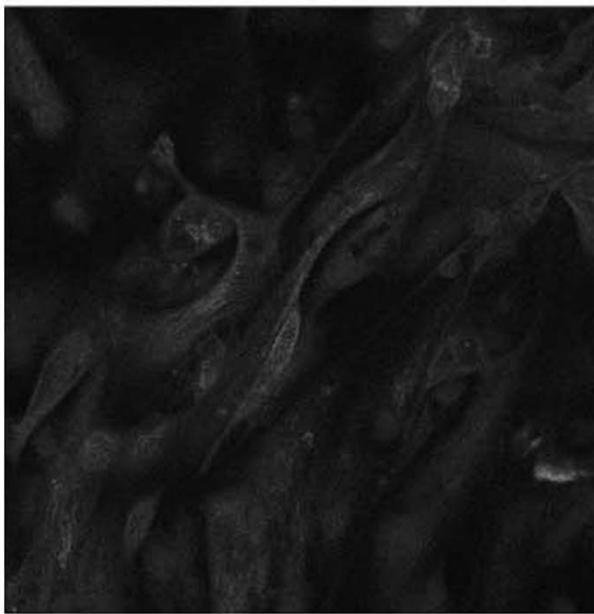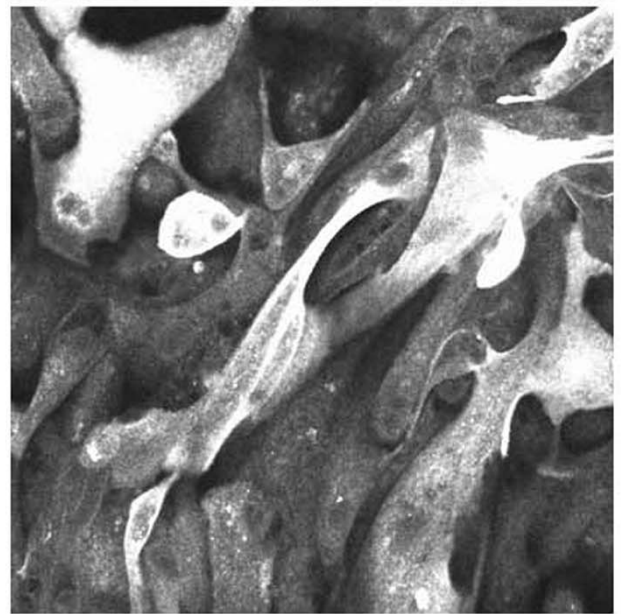

ADPKD

patient 2

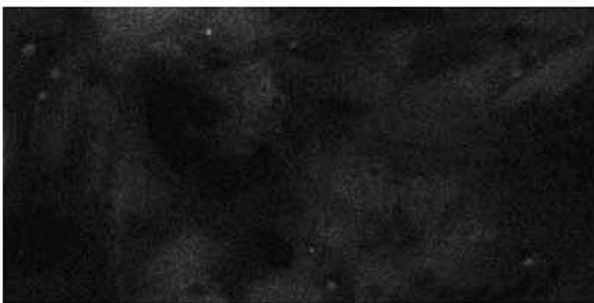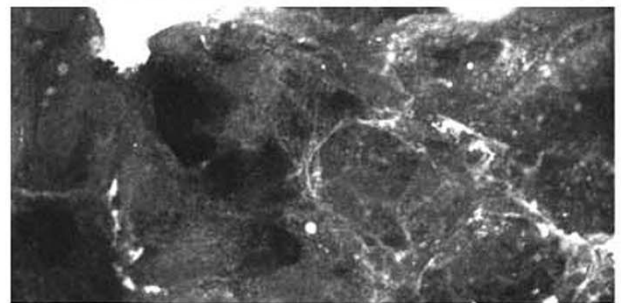

patient 3

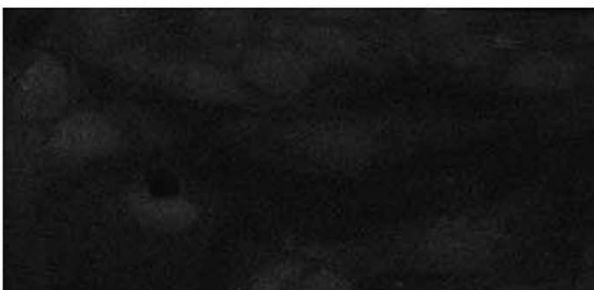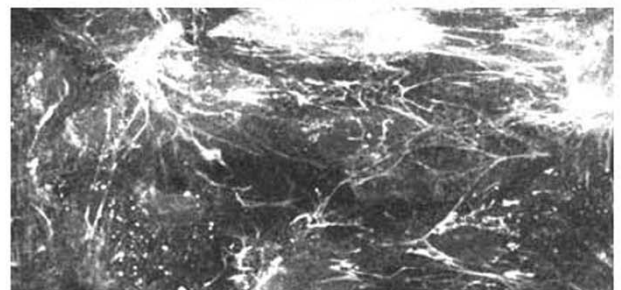

Supplement: mbc_15_3_1334__1.pdf [file mbc_15_3_1334__1.pdf]

ADPKD cyst

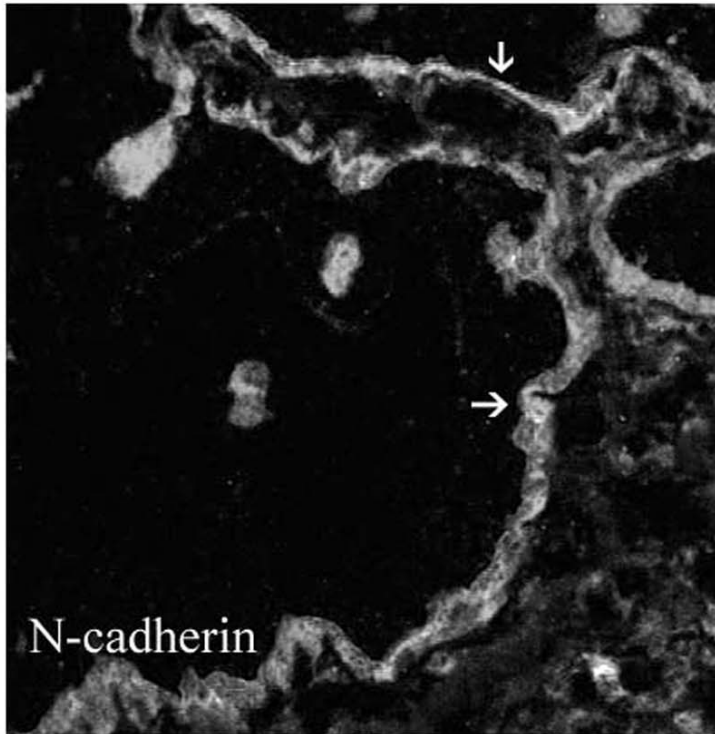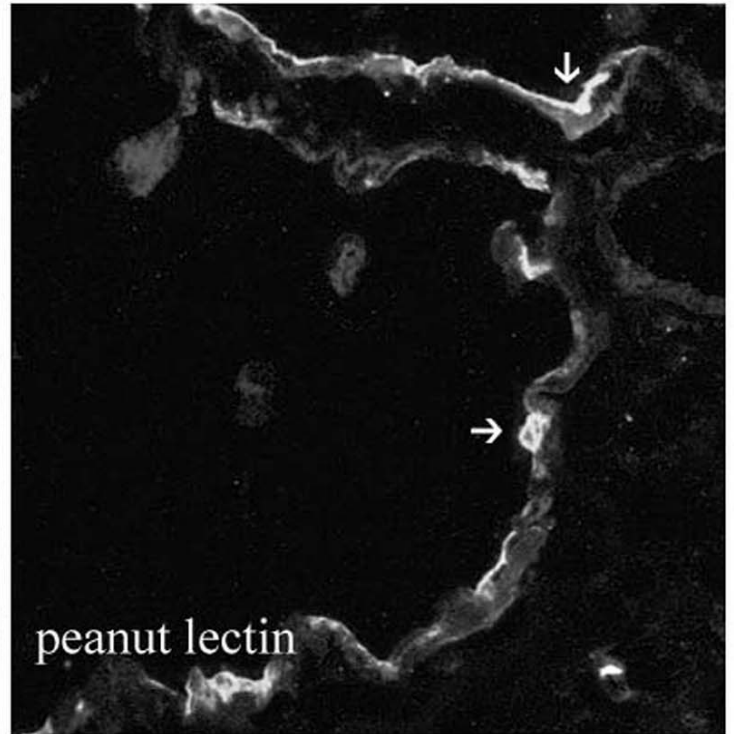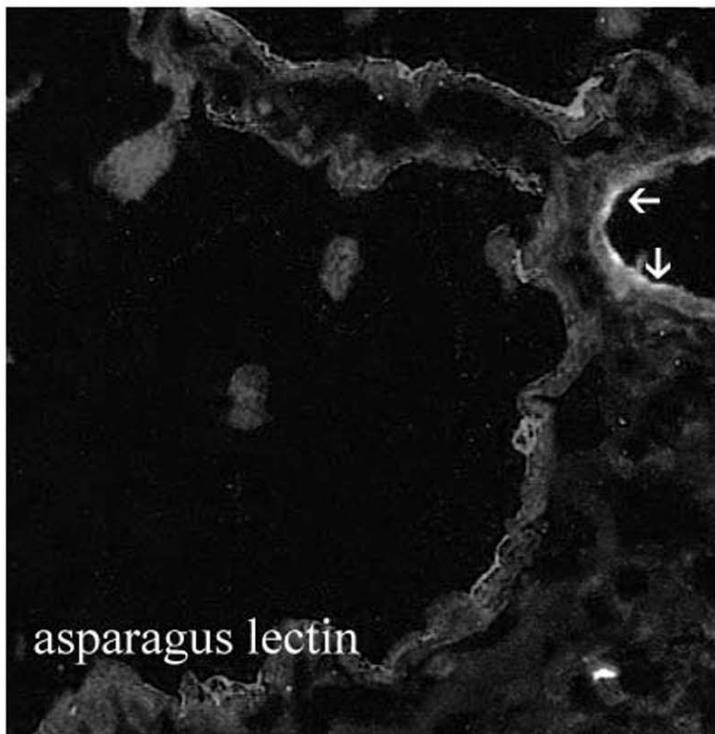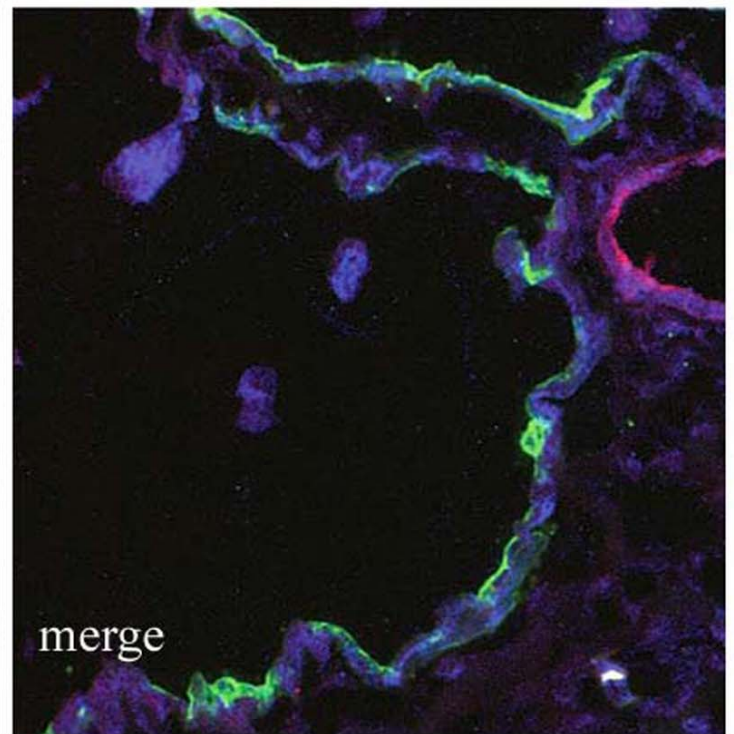

Supplement: mbc_15_3_1334__2.pdf [file mbc_15_3_1334__2.pdf]
